# Supplementary material
Source: publisher site journal article supplement (https://www.dovepress.com/get_supplementary_file.php?f=321800.docx)
Supplement: Supplementary file 1 [file get_supplementary_file.php]

Supplementary materials Table 1: Three factors and four levels of orthogonal experiment table

| Factor | ε-PLL（w/v%） | Voltage（V） | Time（min） |
| --- | --- | --- | --- |
| Exp 1 | 0.05 | 5 | 5 |
| Exp 2 | 0.05 | 10 | 10 |
| Exp 3 | 0.05 | 15 | 15 |
| Exp 4 | 0.05 | 20 | 20 |
| Exp 5 | 0.1 | 5 | 10 |
| Exp 6 | 0.1 | 10 | 5 |
| Exp 7 | 0.1 | 15 | 20 |
| Exp 8 | 0.1 | 20 | 15 |
| Exp 9 | 0.15 | 5 | 15 |
| Exp 10 | 0.15 | 10 | 20 |
| Exp 11 | 0.15 | 15 | 5 |
| Exp 12 | 0.15 | 20 | 10 |
| Exp 13 | 0.2 | 5 | 20 |
| Exp 14 | 0.2 | 10 | 15 |
| Exp 15 | 0.2 | 15 | 10 |
| Exp 16 | 0.2 | 20 | 5 |
